# Supplementary material for: Phosphorylcholine oligomer-grafted graphene oxide for tumor-targeting doxorubicin delivery
Source: Royal Society of Chemistry journal article supplement (doi:10.1039/c7ra08287h), 2017-01-01
Supplement: c7ra08287h1.pdf [file c7ra08287h1.pdf]

## Supporting Information

### Phosphorylcholine Oligomer-Grafted Graphene Oxide for Tumor-Targeting Doxorubicin Delivery

Yu Qin<sup>1</sup>, Changyu Wang<sup>1</sup>, Yun Jiang<sup>1</sup>, Tao Liu<sup>2</sup>, Jianyong Yang<sup>3</sup>, Run Lin<sup>3,\*</sup> and Tao Zhang<sup>1,\*</sup>

1. Department of Biomedical Engineering, College of Engineering and Applied Sciences, Nanjing University, Nanjing 210093, China

2. Jiangsu Provincial Key Laboratory for Interventional Medical Devices, Huaiyin Institute of Technology, Huai'an 223003, China

3. Department of Radiology, the First Affiliated Hospital of Sun Yat-sen University, Guangzhou 510080, China

The limitations of drug loading capabilities of diverse batches of GO are determined not only by the different modification but also by the intrinsic properties such as the size of the GO used as well as the preparation method. A batch of new GO powder was prepared from exfoliated graphite (purchased from KNANO graphene Co. Ltd., Xiamen, China) instead of natural graphite. All the synthetic procedures were carried out in accordance with the methods in the main manuscript. Likewise, loading of DOX onto new prepared GO-PCn-FA was achieved by mechanically mixing DOX solution with GO-PCn-FA solution in different volume ratios overnight, and the drug loading content and loading efficiency of DOX@GO-PCn-FA were determined by a Waters 2695 high-performance liquid chromatography (HPLC) system.

As Fig. S1 shows, the loading content of DOX onto the new prepared GO-PCn-FA raised to above 45%. It was attributable mainly to the decrease in size and thickness of the GO-PCn-FA nanosheets as compared to the previous samples. In other word, the loading content of DOX onto GO-PCn-FA can be readily promoted to a higher level using graphite of distinct physical properties.

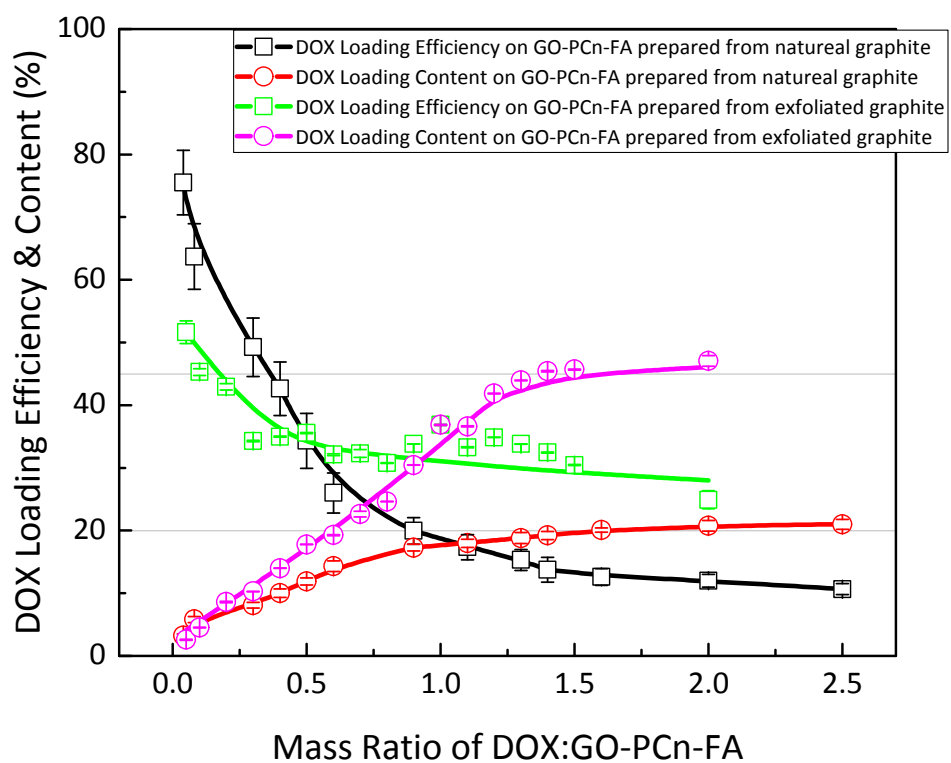

**Fig. S1 Loading efficiency and loading content comparison of DOX onto GO-PCn-FA prepared from different type graphite.**
